# The caudate nucleus controls coordinated patterns of adaptive, context-dependent adjustments to complex decisions

Takahiro Doi<sup>1,3</sup>, Yunshu Fan<sup>1,2</sup>, Joshua I. Gold<sup>1,2</sup>, Long Ding<sup>1,2\*</sup>

<sup>1</sup>Department of Neuroscience, University of Pennsylvania, Philadelphia, PA 19104

<sup>2</sup>Neuroscience Graduate Group, University of Pennsylvania, Philadelphia, PA 19104

<sup>3</sup>Department of Psychology, University of Pennsylvania, Philadelphia, PA 19104

\* To whom correspondence should be addressed.

**Keywords:** basal ganglia, caudate, perceptual decision, reward, saccade, drift diffusion, electrophysiology, non-human primate, oculomotor

**Acknowledgments** We thank Jean Zweigle for animal care. This work was supported by NIH National Eye Institute (R01-EY022411) (L.D. and J.I.G), University of Pennsylvania (University Research Foundation Pilot Award) (L.D.), and Hearst Foundations Graduate student fellowship (Y.F.).

**Author contributions:** Conceptualization, L.D. and J.I.G.; Methodology, Investigation, all authors; Original Draft, L.D; Writing – Review and Editing, all authors.; Supervision and Project Administration, L.D.; Funding Acquisition, L.D. and J.I.G.

**The authors declare no competing interests**

**Data availability:** The datasets generated during and/or analyzed during the current study are available from the corresponding author on reasonable request.

## 1 **Abstract**

2 Our decisions often need to balance what we observe and what we desire. However, our  
3 understanding of how and where in the brain such decisions are made remains limited. A prime  
4 candidate for integrating sensory observations and desired rewards, and a focus of many  
5 modeling studies, is the basal ganglia pathway, which is known to make separate contributions to  
6 perceptual decisions that require the interpretation of uncertain sensory evidence and value-based  
7 decisions that select among outcome options<sup>1-16</sup>. Here we report direct evidence for a causal role  
8 for a major input station of the basal ganglia, the caudate nucleus, in incorporating reward  
9 context and uncertain visual evidence to guide adaptive decision-making. In monkeys making  
10 saccadic decisions based on visual motion evidence and asymmetric reward-choice associations  
11<sup>17</sup>, single caudate neurons encoded information about both the visual evidence and the  
12 asymmetric rewards. Electrical microstimulation at caudate sites with task-modulated activity  
13 during motion viewing affected how the visual and reward information was used to form the  
14 decision. The microstimulation effects included coordinated changes in multiple computational  
15 components of the decision process, mimicking the monkeys' voluntary adjustments in response  
16 to the asymmetric reward contexts. These results imply that the caudate nucleus plays key roles  
17 in coordinating the deliberative decision process that balances external evidence and internal  
18 preferences to guide adaptive behavior.

## 19 **Results**

20 We trained monkeys to report their perceived motion direction of a random-dot kinematogram  
21 by making a saccadic eye movement to one of two visual choice targets at a self-determined time  
22 (Fig. 1a)<sup>17</sup>. We manipulated motion strength across trials and reward-choice association across  
23 blocks of trials. The monkeys' performance depended on both the strength and direction of the  
24 visual-motion evidence and the reward asymmetry (Fig. 1b). Likewise, single-unit activity of  
25 many caudate neurons was jointly modulated by both evidence strength and either reward  
26 context or expected reward size. For example, the activity of the example neuron depicted in Fig.  
27 1c showed three types of modulation: 1) more activity for trials with contralateral choice, both  
28 during motion viewing and around saccade onset (Contra > Ipsi); 2) more activity during the  
29 blocks when the contralateral choice was paired with small reward and the ipsilateral choice was  
30 paired with large reward (green > purple); and 3) more activity for trials with higher coherence  
31 levels, particularly for trials with contralateral choices (dark shade > light shade). Across the  
32 population, caudate neurons showed diverse patterns of modulation by choice, reward context,  
33 expected reward size, and motion strength (Fig. 1d). A majority of neurons (101/142) showed  
34 joint modulation by sensory evidence (motion coherence corresponding to at least one of the two  
35 choices) and reward (either the lateralized reward context or reward size) in at least one epoch  
36 (Fig. 1e). Of these neurons, 50 showed such combined modulation during motion viewing, with  
37 heterogeneous modulation patterns (Extended Data Fig. 1).

38 Supporting a causal role for the caudate nucleus in decision formation, we found that electrical  
39 microstimulation during motion viewing at caudate sites with decision-related activity affected

40 task performance ( $n = 24$  sessions for monkey C, 31 for monkey F). These effects varied across  
41 sites but included choice biases (left-right shifts in the psychometric functions) that were: 1) in  
42 the same direction and of the same magnitude for the two reward contexts (Fig. 2a); 2) in  
43 opposite directions and of the same magnitude for the two reward contexts (Fig. 2b); or 3) in the  
44 same direction for the two reward contexts but of a larger magnitude for one of the two contexts  
45 (Fig. 2c). The effects of microstimulation also included changes in perceptual sensitivity (the  
46 slopes of the psychometric functions) in a reward context-dependent manner (e.g., Fig. 2b,c).  
47 Overall, microstimulation tended to induce a contralateral choice bias and a reduction in  
48 sensitivity (Fig. 2d,e, top histograms). The magnitude of these effects was larger when the  
49 contralateral choice was paired with the large reward (Fig. 2d,e, right histograms; Extended Data  
50 Fig. 2a,b). Thus, caudate neurons can causally contribute to the control of bias- and sensitivity-  
51 related computations that can be both dependent and independent of reward context.

52 We reported previously that the monkeys' patterns of choices and response times (RTs) were  
53 well described by a drift-diffusion model (DDM; Fig. 3a)<sup>17-19</sup>, in which noisy visual evidence is  
54 accumulated over time until reaching a pre-defined, time-varying, bound. In this model, the scale  
55 parameter ( $k$ ) governs the average rate of accumulation, the bound height ( $a$ ) governs the speed-  
56 accuracy trade-off, two parameters govern the time course of the bounds ( $\beta_{alpha}$  and  $\beta_d$ ), and  
57 two choice-specific non-decision times account for non-perceptual processes ( $t_{contra}$  and  
58  $t_{ipsi}$ ). Using the DDM, we showed that the monkeys achieved nearly optimal rewards by: 1) a  
59 general strategy of over-biasing an offset in the neural representation of sensory information ( $me$ )  
60 toward the large-reward choice and compensating with asymmetric adjustments in bound heights  
61 ( $z$ ) that favor the small-reward choice; and 2) coordinating these two kinds of adjustments to  
62 accommodate session-by-session fluctuations in the reward function (Fig. 3b)<sup>17</sup>.

63 These voluntary adjustments to changes in the task conditions were affected systematically by  
64 caudate microstimulation, which evoked behavioral adjustments that were captured by similar  
65 changes in DDM parameters (Extended Data Fig. 3a-c). The effects of microstimulation, as  
66 measured via DDM fits, were variable across sessions (Extended Data Fig. 3d). However, these  
67 effects were not random but reflected a close correspondence with the session-by-session  
68 variability in the monkeys' behavioral adjustments. In particular, for a given DDM parameter,  
69 the microstimulation effect that depended on reward context was negatively correlated across  
70 sessions with the reward asymmetry-induced adjustment (i.e., the difference in value between the  
71 two reward contexts that occurred on non-microstimulation trials; Extended Data Fig. 4a). The  
72 microstimulation effect that was shared between reward contexts was also negatively correlated  
73 with the average value between the two reward contexts on non-microstimulation trials for  
74 certain parameters (Extended Data Fig. 4b).

75 In principle, these microstimulation effects could reflect a role for the caudate neurons in  
76 adjusting the computational components of the decision process in a coordinated manner (Fig.  
77 3c), separately (Fig. 3d), or both. We found evidence for both. Supporting a role for the caudate  
78 in coordinated control, the effects of microstimulation that depended on reward context reflected

79 the monkeys' strategy of coordinating the adjustments in multiple DDM components. For  
80 example, the negative relationship between best-fitting values of  $me$  and  $z$  in response to changes  
81 in the reward context across sessions was recapitulated by the reward context-dependent  
82 microstimulation effects on these parameters (Figs. 3b and 4a,b). Similar effects of  
83 microstimulation extended to other systematic relationships between session-specific values of  
84 pairs of DDM parameters (Fig. 4d, Extended Data Fig. 5). In contrast, the effects of  
85 microstimulation that were independent of reward context did not show similar coordination  
86 among DDM parameters (Fig. 4c,d; Extended Data Fig. 5). Coordinated effects were almost  
87 entirely absent in simulated data using DDM parameter values resampled across sessions and  
88 trial types (Extended Data Fig. 6) and thus were not an artifact of the DDM itself or the fitting  
89 procedure.

90 To further examine these effects, we extracted the principal components (PCs) of the reward  
91 asymmetry-induced changes in all six DDM parameters from trials without microstimulation  
92 (Extended Data Fig. 7). These PCs describe particular patterns of coordinated adjustments to the  
93 decision process. The first three PCs captured similar structure in the reward asymmetry-induced  
94 adjustments without microstimulation (from which the PCs were extracted) and in the additional,  
95 reward context-dependent effects evoked by microstimulation: 93% and 89%, respectively, of  
96 variance explained. In contrast, the same PCs captured only 68% of variance in the  
97 microstimulation effects that did not depend on reward context. These results are consistent with  
98 roles for the caudate in adjusting the computational components of the decision process in both a  
99 coordinated manner, for changes that did depend on reward context, and separately, for changes  
100 that did not depend on reward context.

101 These microstimulation effects also depended on certain properties of neural selectivity at the  
102 sites of microstimulation. For example, we used the first PC from the reward asymmetry-induced  
103 changes as a proxy for the dominant coordination pattern and projected the effects of  
104 microstimulation that depended on reward context onto this PC. Such a projection was  
105 negatively correlated with the strength of neural modulation by the interaction between reward  
106 size and motion strength (Fig. 4e). This result implies that neurons that combine reward and  
107 visual information appear to play a particularly direct role in coordinating the patterns of  
108 adjustments used in these decisions. Two other effects were more consistent with a role for the  
109 caudate in adjusting components of the decision process separately. First, the strength of neural  
110 selectivity for choice was correlated with the microstimulation effect on the asymmetric bound  
111 height ( $z$ ), but only when choice and reward context modulations were congruent (i.e., higher  
112 activity for the ipsi-/contra-lateral choice and when the ipsi-/contra-lateral choice was paired  
113 with large reward; Fig. 4f). Second, the strength of neural modulation by coherence was  
114 correlated with the effect on the average rate of evidence accumulation ( $k$ ), but only when the  
115 modulation had the same sign for both choices (Fig. 4g). These results imply that separate  
116 subsets of caudate neurons may help control choice biases towards a particular alternative<sup>11, 20, 21</sup>  
117 and the monkeys' perceptual sensitivity, respectively.

118 Collectively, our results suggest that caudate neurons causally contribute to deliberative  
119 decisions that combine reward-asymmetry and visual information. Their contributions include  
120 integrating these two sources of information at the level of single neurons and across the  
121 population of neurons, driving coordinated adjustments of multiple components of decision-  
122 related computations to rationally balance these sources of information, and mediating more  
123 directly the implementation of these computational components. The caudate nucleus' role in  
124 coordinating decision-related computations is reminiscent of the role of premotor areas in  
125 controlling coordinated movements<sup>22</sup> and may reflect a general organization principle in which  
126 motor or cognitive primitives are aggregated into behaviorally relevant combinations. These  
127 complex and flexible contributions might also partially explain the complicated nature of  
128 decision-making impairments with striatal dysfunction, such as in addiction<sup>23</sup>.

129

130

## 131 **Methods**

132 We used two adult male rhesus macaques (*Macaca mulatta*) for this study. They were first  
133 trained extensively on an equal-reward reaction-time random-dot motion discrimination task<sup>3,24</sup>,  
134<sup>25</sup> and then trained with the asymmetric-reward contexts<sup>17</sup>. All training and experimental  
135 procedures were in accordance with the National Institutes of Health Guide for the Care and Use  
136 of Laboratory Animals and were approved by the University of Pennsylvania Institutional  
137 Animal Care and Use Committee.

### 138 ***Behavioral task***

139 Task details are reported elsewhere<sup>17</sup>. Briefly, a trial began with a central fixation point  
140 presentation. Upon acquiring and maintaining fixation, two choice targets were presented to  
141 inform the monkeys the two possible motion directions. After a random delay picked from a  
142 truncated exponential distribution (mean = 0.7 s, range: 0.4-2.5 s), the fixation point was dimmed  
143 and a random-dot kinematogram was shown at the center of the screen ("dots onset"). For each  
144 trial, the kinematogram had a constant speed of 6°/s, aperture size of 5°, and randomly  
145 interleaved motion direction and strength (five levels of coherence: 3.2, 6.4, 12.8, 25.6, 51.2%).  
146 The monkey reported the perceived motion direction by making a self-timed saccade to the  
147 corresponding choice target. A minimum 50-ms latency was imposed, although the monkeys  
148 rarely made fast-guess responses during this study. Once the monkey's gaze exited the fixation  
149 window (4° square window), the kinematogram was extinguished. Once the monkey's gaze  
150 reached the choice target window (4° square window), a 400-ms minimum fixation time was  
151 imposed to register the monkey's choice. Correct choices were rewarded with juice. Error  
152 choices were not rewarded and penalized with a timeout before the next trial (3 s for monkey F,  
153 0.5–2 s for monkey C).

154 Two asymmetric reward contexts were alternated in a block design. In Contra-LR blocks, the  
155 choice contralateral to the recording/stimulation site was paired with large reward. In Ipsi-LR

156 blocks, the choice ipsilateral to the recording/stimulation site was paired with large reward. The  
157 other choice was paired with small reward. At the start of each block, the choice targets were  
158 presented with different colors to signal the current reward context to the monkeys, followed by  
159 two additional high-coherence trials to allow the monkeys to experience the current reward  
160 context. These trials were excluded from analysis.

### 161 *Data acquisition*

162 Eye position was monitored using a video-based system (ASL) sampled at 240 Hz. Response  
163 time (RT) was measured as the time from stimulus onset to saccade onset, the latter identified  
164 offline with respect to velocity ( $> 40^\circ/\text{s}$ ) and acceleration ( $> 8000^\circ/\text{s}^2$ ). Single-unit recordings  
165 focused on putative project neurons<sup>24</sup>. We searched for task-relevant neurons while the monkeys  
166 performed the equal-reward motion discrimination task with horizontal dots motions and  
167 determined the presence of task-related modulation of neural activity by visual and audio  
168 inspection of ~10–20 trials. For analyses of neural response properties, only well-isolated single  
169 units were included. For analyses of microstimulation effects, sites with either single- or multi-  
170 unit task-related modulations were used. Neural signals were amplified, filtered and stored using  
171 a MAP acquisition system (Plexon, Inc.), along with time-stamped event codes, analog eye  
172 position signals and trial parameter values. Single unit activity was identified by offline spike  
173 sorting (Offline Sorter, Plexon, Inc.). Multiunit activity was measured using waveforms that  
174 passed an offline amplitude threshold. For the microstimulation experiments, we first identified a  
175 caudate site with task-related activity and then interleaved trials with and without  
176 microstimulation at a 1:1 ratio. Electrical microstimulation was delivered during motion stimulus  
177 presentation (negative-leading bipolar current pulses, 300 Hz, 50  $\mu\text{A}$ , 250  $\mu\text{s}$  pulse duration) in  
178 half of trials randomly interleaved with no-stimulation trials. Caudate microstimulation with  
179 these parameters do not evoke saccades<sup>3, 26-28</sup>.

### 180 *Neural data analysis*

181 For each single/multi-unit dataset, we computed the average firing rates in seven task epochs:  
182 three epochs before motion stimulus onset (400 ms window beginning at target onset, variable  
183 window from target onset to dots onset, and 400 ms window ending at dots onset), two epochs  
184 during motion viewing (a fixed window from 100 ms after dots onset to 100 ms before median  
185 RT and a variable window from 100 ms after dots onset to 100 ms before saccade onset), a peri-  
186 saccade 300 ms window beginning at 100 ms before saccade onset, and a post-saccade 400 ms  
187 window beginning at saccade onset (before reward delivery). For each unit, a multiple linear  
188 regression was performed for each task epoch separately.

$$\begin{aligned} 189 \quad FR &= \beta_0 + \beta_{\text{Choice}} \times I_{\text{Choice}} + \beta_{\text{RewCont}} \times I_{\text{RewCont}} + \beta_{\text{RewSize}} \times I_{\text{RewSize}} \\ 190 \quad &+ \beta_{\text{Coh-Contra}} \times I_{\text{Coh-Contra}} + \beta_{\text{Coh-Ipsi}} \times I_{\text{Coh-Ipsi}} \\ 191 \quad &+ \beta_{\text{RewCoh-Contra}} \times I_{\text{Coh-Contra}} \times I_{\text{RewSize}} + \beta_{\text{RewCoh-Ipsi}} \times I_{\text{Coh-Ipsi}} \times I_{\text{RewSize}}, \end{aligned}$$

$$192 \quad \text{where } I_{\text{Choice}} = \begin{cases} 1 & \text{for contralateral choice} \\ -1 & \text{for ipsilateral choice} \end{cases},$$



$$193 \quad I_{RewCont} = \begin{cases} 1 \text{ for contralateral - large Reward} \\ -1 \text{ for ipsilateral - large Rew} \end{cases},$$

$$194 \quad I_{RewSize} = \begin{cases} 1 \text{ for large reward} \\ -1 \text{ for small reward} \end{cases}$$

$$195 \quad I_{Coh-Contra} = \begin{cases} \text{absolute coherence for contralateral choice (centered at mean value)} \\ 0 \text{ for ipsilateral choice} \end{cases},$$

$$196 \quad \text{and } I_{Coh-Ipsi} = \begin{cases} 0 \text{ for contralateral choice} \\ \text{absolute coherence for ipsilateral choice (centered at mean value)} \end{cases}$$

197

198 Significance of non-zero coefficients was tested using *t*-test (criterion:  $p = 0.05$ ).

199 For the microstimulation experiments, we recorded single- or multi-unit activity before  
200 microstimulation and performed multiple linear regression as above for each unit separately and  
201 normalized the regression coefficients to  $\beta_0$ . If more than one unit was recorded at a site, for each  
202 regressor, we used the beta value associated with the lowest *p* value.

### 203 **Behavioral analysis**

204 For each microstimulation session, a logistic function was fitted to the choice data for all trials:

$$205 \quad P_{contra \text{ choice}} = \frac{1}{1 + e^{-Sensitivity \times (Coh - Bias)}},$$

206 Where

$$207 \quad Sensitivity = s_0 + s_{rew} \cdot RewCont + s_{estim} \cdot Estim + s_{rew \times estim} \cdot RewCont \cdot Estim,$$

$$208 \quad Bias = bias_0 + bias_{rew} \cdot RewCont + bias_{estim} \cdot Estim + bias_{rew \times estim} \cdot RewCont \cdot Estim,$$

$$209 \quad RewCont = \begin{cases} 1 \text{ for contralateral - large Reward} \\ -1 \text{ for ipsilateral - large Rew} \end{cases},$$

$$210 \quad \text{and } Estim = \begin{cases} 1 \text{ for microstimulation trials} \\ 0 \text{ for control trials} \end{cases}.$$

211

212 We fitted the choice and RT data to different variants of the drift-diffusion model (DDM; Fig. 3a  
213 and Extended Data Fig. 3). The basic DDM assumed that the decision variable (DV) is the time  
214 integral of evidence (E), which was modeled as a Gaussian distributed random variable,

$$215 \quad E \sim N(k * coherence, 1) \quad \text{and} \quad DV = \int E dt$$

216 The scale parameter *k* controlled the drift rate. At each time point, the DV was compared with  
217 two collapsing choice bounds<sup>19</sup>. The time course of the choice bounds was specified as  $a/(1 +$   
218  $e^{\beta\_alpha(t - \beta\_d)})$ , where  $\beta\_alpha$  and  $\beta\_d$  controlled the rate and onset of decay, respectively. If

219 DV crossed the upper bound first, a contralateral choice was made; if DV crossed the lower  
220 bound first, an ipsilateral choice was made. RT was modeled as the sum of the time till first  
221 bound crossing and saccade-specific non-decision times that accounted for evidence-independent  
222 sensory/motor delays. Two types of biases were used to account for reward asymmetry-induced  
223 biases, a bias in drift rate ( $me$ ) and a bias in the starting point ( $z$ )<sup>17</sup>.

224 DDM model fitting was performed, separately for each session, using the maximum *a posteriori*  
225 estimate method (python v3.5.1, pymc 2.3.6) and prior distributions suitable for human and  
226 monkey subjects<sup>29</sup>. We performed at least five runs for each variant and used the run with the  
227 highest likelihood for further analyses. As a sanity check for the quality of fits, we compared the  
228 perceptual sensitivity and choice bias estimated from logistic function fits to those estimated  
229 using the “NoCollapse” variant. Both perceptual sensitivity and choice bias were highly  
230 correlated between these two estimation methods (Pearson correlation coefficients = 0.85 and  
231 0.98, respectively;  $p < 1e-50$  for both).

232 We used eight variants of the DDM model: in the “Full” model, all parameters were allowed to  
233 vary by reward context and microstimulation status; in the “NoEstim” model, all parameters  
234 were allowed to vary by reward context, but not microstimulation status (Extended Data Fig. 3a);  
235 in the “NoCollapse” model,  $\beta\_alpha$  and  $\beta\_d$  were fixed across microstimulation status; in the  
236 “NoA”, “NoK”, “NoME”, and “NoZ” models,  $a$ ,  $k$ ,  $me$ , and  $z$  were fixed across microstimulation  
237 status, respectively; and in the “NoT0” model, saccade-specific non-decision times ( $t\_contra$  and  
238  $t\_ipsi$ ) were fixed across microstimulation status (Extended Data Fig. 3b,c). We used the Akaike  
239 information criterion (AIC) for model comparisons, with lower values indicating more  
240 parsimonious model variants.

241 For a given DDM parameter, we parsed the different effects as follows (LR: large reward):

$$242 \text{Para}(\text{base}) = (\text{Para}_{\text{contral-LR,no estim}} + \text{Para}_{\text{ipsi-LR,no estim}})/2$$

$$243 \text{Para}(\text{rew}) = (\text{Para}_{\text{contral-LR,no estim}} - \text{Para}_{\text{ipsi-LR,no estim}})/2$$

$$244 \text{Para}(\text{estim}) = (\text{Para}_{\text{contral-LR,estim}} + \text{Para}_{\text{ipsi-LR,estim}} - \text{Para}_{\text{contral-LR,no estim}} - \text{Para}_{\text{ipsi-LR,no estim}})/2$$

$$245 \text{Para}(\text{rew} \times \text{estim})$$

$$246 = (\text{Para}_{\text{contral-LR,estim}} - \text{Para}_{\text{ipsi-LR,estim}} - \text{Para}_{\text{contral-LR,no estim}} + \text{Para}_{\text{ipsi-LR,no estim}})/2$$

247 To control for potential artifacts from our analysis methods, we pooled the fitted values across  
248 reward-microstimulation conditions and sessions for each parameter, resampled from these  
249 values with replacement for each session and reward-microstimulation condition, simulated  
250 sessions with matched numbers of trials for each condition using the resampled parameter values,  
251 and re-fitted these simulated data with the Full and NoCollapse DDM models. The fitted values  
252 were used to compute the correlation patterns shown in Extended Data Fig. 6.

253 Principal component analysis (PCA) in Extended Data Fig. 7 was performed using python scikit-  
254 learn v0.18.1. Before PCA, the DDM parameters were pooled across “rew”, “rew x estim” and  
255 “estim” measurements to find the range for each parameter. The DDM parameters were then  
256 normalized linearly to these ranges such that each normalized parameter was in the range of [0,



257 1], but not mean-subtracted. For data presented in Fig. 4e, the microstimulation effects that  
258 depended on reward context was projected onto the first PC extracted from the reward  
259 asymmetry-induced adjustments in non-microstimulation trials.

260

## 261 **Figure Legends**

### 262 **Figure 1. Task, behavior and caudate activity.**

263 a) For the asymmetric reward motion discrimination task, a monkey observed a random-dot  
264 motion stimulus and reported the perceived global motion with a saccade to one of two choice  
265 targets. Motion direction and strength (coherence) were pseudo-randomly selected from trial to  
266 trial. In a block of trials, a correct rightward choice was paired with a large reward and correct  
267 leftward choice was paired with a small reward. Error trials were not rewarded. The asymmetric  
268 reward contexts (left versus right) were alternated between blocks of trials.

269 b) Average choice behavior of two monkeys ( $n = 17,493$  trials from 38 sessions for monkey C,  
270  $29,599$  trials from 79 sessions for monkey F). The gap between red and blue curves indicates that  
271 both monkeys were more likely to choose the choice paired with large reward.

272 c) Example neuron showing joint modulation by choice (labels), motion strength (shading) and  
273 reward context (colors).

274 d) Percentage of neurons showing non-zero linear regression coefficients for different regressors  
275 and task epochs ( $n = 49$  for monkey C,  $93$  for monkey F;  $t$ -test,  $p < 0.05$ ). Dashed lines indicate  
276 chance level. The 7 vertical color bars indicate task epochs (defined in Methods).

277 e) Percentage of neurons showing joint visual evidence and reward modulation. Dashed line  
278 indicates chance level.

279

### 280 **Figure 2. Caudate microstimulation affected monkeys' decision behavior.**

281 a-c) Three example sessions from monkey C, showing different patterns of microstimulation  
282 effects. Black: trials without microstimulation; red: trials with microstimulation; dashed lines:  
283 logistic fits for trials in blocks when the contralateral choice was paired with small reward; solid  
284 lines: logistic fits for trials in blocks when the contralateral choice was paired with large reward.

285 d,e) Changes in choice bias (d, logistic shift) and perceptual sensitivity (e, logistic slope) induced  
286 by electrical microstimulation (abscissa and top histograms) or interactions between electrical  
287 microstimulation and reward condition (ordinate and right histograms). d, median values=0.79%,  
288 Wilcoxon signed rank test,  $p=0.015$  for the top histogram, 0.83% coherence,  $p=0.0035$  for the  
289 right histogram. e,  $-2.1$ ,  $p=0.0012$  for the top histogram,  $-1.8$ ,  $p=0.019$  for the right histogram.  
290 Colored circles with labels (a, b, c) correspond to the example sessions in a–c.

291

### 292 **Figure 3. Predicted microstimulation effects on reward asymmetry-induced coordinated** 293 **adjustments of multiple computational components.**

294 a) Drift-diffusion model. Motion evidence ( $E$ ) is modeled as samples from a Gaussian  
295 distribution (mean =  $k \times \text{signed coh}$ , variance = 1). The decision variable is computed as the time  
296 integral of  $E$  and compared at each time point to two (possibly time-varying) decision bounds.  
297 Crossing of either bound results in the corresponding choice. RT is modeled as the sum of the  
298 time to bound-crossing and a non-decision time.

299 b) Both monkeys showed coupled adjustments in  $me$  and  $z$  parameters in the asymmetric reward  
300 contexts. Data were from a previous study without microstimulation<sup>17</sup>.

301 c,d) Alternative models of caudate's role in coordinated decision adjustments (e.g., changes in  
302  $me$  and  $z$  from the DDM). In principle, caudate neurons (red circles) could provide joint (c) or  
303 independent (d) control of each computational variable.

304

305 **Figure 4. Correlated microstimulation effects on DDM parameters reflected correlated**  
306 **reward asymmetry effects.**

307 a–c) Scatterplots of asymmetric adjustments in momentary evidence ( $me$ ) and the bound height  
308 asymmetry ( $z$ ) from fits of the DDM (Fig. 3a) to behavior for the reward asymmetry-induced  
309 adjustments in non-microstimulation trials (a), reward context-dependent microstimulation  
310 effects (b), and reward context-independent microstimulation effects (c). Solid lines indicate  
311 linear regression results with significant, non-zero slope values (two-sided  $t$ -test,  $p < 0.05$ ).  
312 Shaded areas indicate 95% confidence intervals. The line in (a) was replotted in (b) in red for  
313 comparison.

314 d) Pair-wise correlations between pairs of DDM parameters for the reward asymmetry-induced  
315 adjustments in non-microstimulation trials (“rew”), reward context-dependent microstimulation  
316 effects (“rew x estim”), and reward context-independent microstimulation effects (“estim”). Each  
317 color-coded box represents the average Pearson correlation coefficients of the two monkeys for  
318 changes in a pair of DDM parameters across sessions (see color bar). Pairs with non-significant  
319 correlation ( $p > 0.05$ , not corrected for multiple comparison) for either monkey or significant  
320 correlations but of opposite signs are shown in gray.

321 e) Scatterplot of the regression coefficient for neural encoding of the reward size-coherence  
322 interaction for trials with ipsilateral choices and the projections of reward context-dependent  
323 microstimulation effects from the DDM fits along PC1 (see text). Red data points/line: monkey  
324 C,  $p = 0.02$ ; Green data points/line: monkey F, 0.004.

325 f) Scatterplot of the regression coefficient value for neural encoding of “choice” and the reward  
326 context-independent microstimulation effect on the best-fitting value of the asymmetry bound  
327 height parameter ( $z$ ). Red circles and line: sites in which the choice and reward context  
328 preferences were congruent; linear regression,  $p = 0.026$ . Black circles: sites with incongruent  
329 preferences;  $p = 0.72$ .

330 g) Scatterplot of the regression coefficient value for neural encoding of coherence for  
331 contralateral-choice trials and the reward context-independent microstimulation effect on the  
332 best-fitting value of the scalar for evidence ( $k$ ). Red circles and line: sites in which the two  
333 coefficients for Coh-Contra and Coh-Ipsi had the same signs; linear regression  $t$ -test,  $p = 0.023$   
334 and 0.009 for contralateral and ipsilateral choices (not shown), respectively. Black circles: sites  
335 with opposite signs;  $p > 0.4$  for both choices.

336  
337

338 **Extended Data Figure 1. Modulation patterns of “combination neurons” during motion**  
339 **viewing.**

340 Color map showing the presence of significant non-zero regression coefficients for each  
341 combination neuron (in rows) during the epoch from 100 ms after motion onset until 100 ms

342 before saccade onset. Yellow: positive; dark blue: negative; green: not significant; criterion:  $p =$   
343 0.05. Neurons were sorted by the signs of the coefficients.

344

### 345 **Extended Data Figure 2.**

346 Scatterplots of effects of microstimulation on choice bias (a) and perceptual sensitivity (b) for the  
347 two reward contexts (contralateral-small-reward blocks on the abscissa, contralateral-large-  
348 reward blocks on the ordinate), measured from logistic fits to choice data. Gray data points  
349 represent sessions without a significant effect for either reward context (logistic regression,  
350  $p > 0.05$ ).

351

### 352 **Extended Data Figure 3. DDM fitting results.**

353 a) Histogram of the difference in AIC between the full model, in which all DDM parameters  
354 were allowed to vary by reward context and microstimulation status, and a reduced model, in  
355 which all DDM parameters were allowed to vary by reward context but not microstimulation  
356 status. Negative AIC implies that the full model is better. The red arrow indicates the criterion  
357 we used and corresponds to the gap in the histogram.

358 b) Map showing the best DDM variant (lowest AIC, black bar) for sessions that showed an effect  
359 of microstimulation, which was defined as having a smaller AIC with the full model than a  
360 reduced model without microstimulation-induced changes (39 sessions to the left of the red  
361 arrow in a). See Methods for model variant definitions.

362 c) Histograms of differences in AIC between the full model and reduced models. Mean  $\Delta$ AIC  
363 values were negative for all reduced models ( $t$ -test,  $p < 0.001$  for all).

364 d) Histograms of best-fitting DDM parameters from the best model for each session. The top row  
365 (“Estim”) shows reward context-independent microstimulation effects. The bottom row (“Rew x  
366 Estim”) shows reward context-dependent microstimulation effects. Triangles indicate median  
367 values; red triangles indicate non-zero median values (Wilcoxon signed-rank test,  $p < 0.05$ , not  
368 corrected for multiple comparisons).

369

### 370 **Extended Data Figure 4. Relationships between microstimulation effects and monkeys’** 371 **voluntary adjustments.**

372 a) Scatterplots of the effects of microstimulation that depended on reward context (ordinate) and  
373 reward asymmetry-induced adjustments without microstimulation (abscissa). Lines: linear  
374 regressions. P values were from  $t$ -test.

375 b) Scatterplots of the average effects of microstimulation between reward contexts (ordinate) and  
376 average adjustments between reward contexts without microstimulation (abscissa). Lines: linear  
377 regressions. P values were from  $t$ -test.

378

379 **Extended Data Figure 5. Pairwise correlation for the two monkeys.** Same format as Fig. 4d,  
380 but showing data from the two monkeys separately (rows).

381

382

383 **Extended Data Figure 6. Pairwise correlation for simulated data fitted by the “Full” (top**  
384 **row) and “NoCollapse” (bottom row) models.** Choice and RT data were simulated using the  
385 DDM with random combinations of parameter values resampled from model fits from all  
386 individual sessions. Same format as Fig. 4d. Note the overall absence of consistent relationships  
387 between pairs of best-fitting parameter values.

388

389

390 **Extended Data Figure 7. Principal component analysis.**

391 a) Cumulative fractions of variance of the session-specific values of best-fitting DDM  
392 parameters explained by principal components (PCs) of those parameters computed using best-  
393 fitting values of reward asymmetry-induced adjustments from non-microstimulation trials. Red:  
394 reward asymmetry-induced adjustments from non-microstimulation trials (“rew”), from which  
395 the PCs were extracted. Purple: reward context-dependent microstimulation effects (“rew-  
396 estim”). Green: reward context-independent microstimulation effects (“estim”).

397 b) Projections of “rew” (red), “rew-estim” (purple) and “estim” (green) effects on DDM  
398 parameters in a 3D space defined by the first three principal components derived from the “rew”  
399 effects. The same “rew” data are plotted in both panels.

400

401

## 402 References

- 403 1. Cavanagh, J.F., *et al.* Subthalamic nucleus stimulation reverses mediofrontal influence  
404 over decision threshold. *Nat Neurosci* 14, 1462-1467 (2011).
- 405 2. Santacruz, S.R., Rich, E.L., Wallis, J.D. & Carmena, J.M. Caudate Microstimulation  
406 Increases Value of Specific Choices. *Curr Biol* 27, 3375-3383 e3373 (2017).
- 407 3. Ding, L. & Gold, J.I. Separate, causal roles of the caudate in saccadic choice and  
408 execution in a perceptual decision task. *Neuron* 75, 865-874 (2012).
- 409 4. Tai, L.H., Lee, A.M., Benavidez, N., Bonci, A. & Wilbrecht, L. Transient stimulation of  
410 distinct subpopulations of striatal neurons mimics changes in action value. *Nat Neurosci* 15,  
411 1281-1289 (2012).
- 412 5. Yartsev, M.M., Hanks, T.D., Yoon, A.M. & Brody, C.D. Causal contribution and  
413 dynamical encoding in the striatum during evidence accumulation. *eLife* 7 (2018).
- 414 6. Wang, L., Rangarajan, K.V., Gerfen, C.R. & Krauzlis, R.J. Activation of Striatal Neurons  
415 Causes a Perceptual Decision Bias during Visual Change Detection in Mice. *Neuron* 97, 1369-  
416 1381 e1365 (2018).
- 417 7. Nakamura, K. & Hikosaka, O. Role of dopamine in the primate caudate nucleus in  
418 reward modulation of saccades. *J Neurosci* 26, 5360-5369 (2006).
- 419 8. Tachibana, Y. & Hikosaka, O. The Primate Ventral Pallidum Encodes Expected Reward  
420 Value and Regulates Motor Action. *Neuron* 76, 826-837 (2012).
- 421 9. Kim, H.F. & Hikosaka, O. Distinct basal ganglia circuits controlling behaviors guided by  
422 flexible and stable values. *Neuron* 79, 1001-1010 (2013).
- 423 10. Summerfield, C. & Tsetsos, K. Building Bridges between Perceptual and Economic  
424 Decision-Making: Neural and Computational Mechanisms. *Front Neurosci* 6, 70 (2012).
- 425 11. Ding, L. & Gold, J.I. The basal ganglia's contributions to perceptual decision making.  
426 *Neuron* 79, 640-649 (2013).
- 427 12. Redgrave, P., Prescott, T.J. & Gurney, K. The basal ganglia: a vertebrate solution to the  
428 selection problem? *Neuroscience* 89, 1009-1023 (1999).
- 429 13. Rao, R.P. Decision making under uncertainty: a neural model based on partially  
430 observable markov decision processes. *Frontiers in computational neuroscience* 4, 146 (2010).
- 431 14. Kable, J.W. & Glimcher, P.W. The neurobiology of decision: consensus and controversy.  
432 *Neuron* 63, 733-745 (2009).
- 433 15. Ratcliff, R. & Frank, M.J. Reinforcement-based decision making in corticostriatal circuits:  
434 mutual constraints by neurocomputational and diffusion models. *Neural Comput* 24, 1186-1229  
435 (2012).
- 436 16. Bogacz, R. & Gurney, K. The basal ganglia and cortex implement optimal decision  
437 making between alternative actions. *Neural Comput* 19, 442-477 (2007).
- 438 17. Fan, Y., Gold, J.I. & Ding, L. Ongoing, rational calibration of reward-driven perceptual  
439 biases. *eLife* 7, e36018 (2018).
- 440 18. Ratcliff, R. & Rouder, J.N. Modeling response times for two-choice decisions. *Psychol*  
441 *Sci* 9, 347-356 (1998).
- 442 19. Zylberberg, A., Fetsch, C.R. & Shadlen, M.N. The influence of evidence volatility on  
443 choice, reaction time and confidence in a perceptual decision. *eLife* 5 (2016).
- 444 20. Lauwereyns, J., Watanabe, K., Coe, B. & Hikosaka, O. A neural correlate of response  
445 bias in monkey caudate nucleus. *Nature* 418, 413-417 (2002).
- 446 21. Hikosaka, O., Nakamura, K. & Nakahara, H. Basal ganglia orient eyes to reward. *J.*  
447 *Neurophysiol.* 95, 567-584 (2006).
- 448 22. Graziano, M.S., Taylor, C.S. & Moore, T. Complex movements evoked by  
449 microstimulation of precentral cortex. *Neuron* 34, 841-851 (2002).
- 450 23. Noël, X., Brevers, D. & Bechara, A. A neurocognitive approach to understanding the  
451 neurobiology of addiction. *Current Opinion in Neurobiology* 23, 632-638 (2013).



- 452 24. Ding, L. & Gold, J.I. Caudate encodes multiple computations for perceptual decisions. *J*  
453 *Neurosci* 30, 15747-15759 (2010).
- 454 25. Ding, L. & Gold, J.I. Neural correlates of perceptual decision making before, during, and  
455 after decision commitment in monkey frontal eye field. *Cereb Cortex* 22, 1052-1067 (2012).
- 456 26. Watanabe, M. & Munoz, D.P. Saccade suppression by electrical microstimulation in  
457 monkey caudate nucleus. *J Neurosci* 30, 2700-2709 (2010).
- 458 27. Watanabe, M. & Munoz, D.P. Saccade reaction times are influenced by caudate  
459 microstimulation following and prior to visual stimulus appearance. *J Cogn Neurosci* 23, 1794-  
460 1807 (2011).
- 461 28. Nakamura, K. & Hikosaka, O. Facilitation of saccadic eye movements by postsaccadic  
462 electrical stimulation in the primate caudate. *J Neurosci* 26, 12885-12895 (2006).
- 463 29. Wiecki, T.V., Sofer, I. & Frank, M.J. HDDM: Hierarchical Bayesian estimation of the Drift-  
464 Diffusion Model in Python. *Frontiers in neuroinformatics* 7, 14 (2013).
- 465
- 466

Fig 1

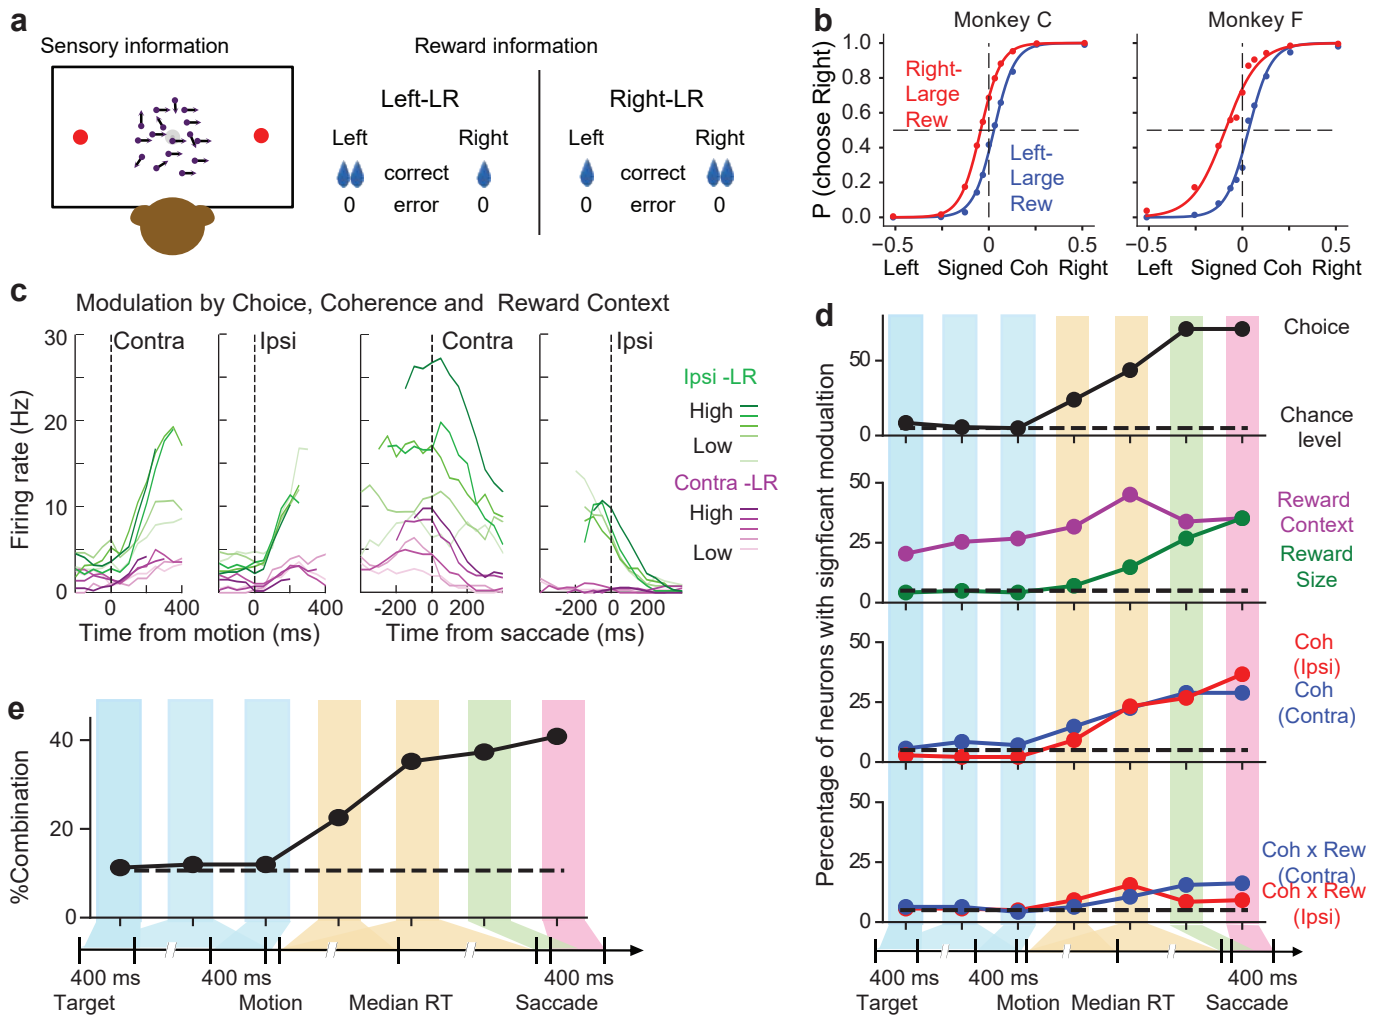

### Figure 1. Task, behavior and caudate activity.

- a) For the asymmetric reward motion discrimination task, a monkey observed a random-dot motion stimulus and reported the perceived global motion with a saccade to one of two choice targets. Motion direction and strength (coherence) were pseudo-randomly selected from trial to trial. In a block of trials, a correct rightward choice was paired with a large reward and correct leftward choice was paired with a small reward. Error trials were not rewarded. The asymmetric reward contexts (left versus right) were alternated between blocks of trials.
- b) Average choice behavior of two monkeys ( $n = 17,493$  trials from 38 sessions for monkey C, 29,599 trials from 79 sessions for monkey F). The gap between red and blue curves indicates that both monkeys were more likely to choose the choice paired with large reward.
- c) Example neuron showing joint modulation by choice (labels), motion strength (shading) and reward context (colors).
- d) Percentage of neurons showing non-zero linear regression coefficients for different regressors and task epochs ( $n = 49$  for monkey C, 93 for monkey F;  $t$ -test,  $p < 0.05$ ). Dashed lines indicate chance level. The 7 vertical color bars indicate task epochs (defined in Methods).
- e) Percentage of neurons showing joint visual evidence and reward modulation. Dashed line indicates chance level.

Fig. 2

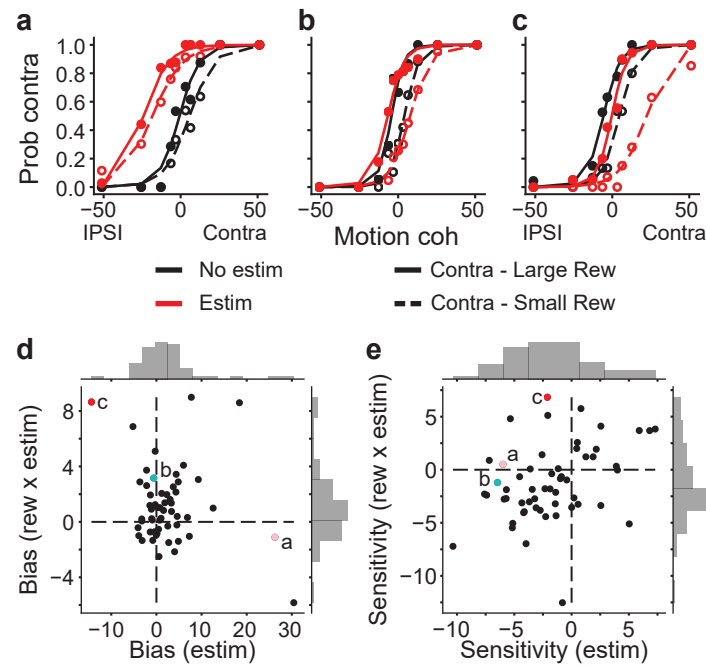

**Figure 2. Caudate microstimulation affected monkeys' decision behavior.**

a-c) Three example sessions from monkey C, showing different patterns of microstimulation effects. Black: trials without microstimulation; red: trials with microstimulation; dashed lines: logistic fits for trials in blocks when the contralateral choice was paired with small reward; solid lines: logistic fits for trials in blocks when the contralateral choice was paired with large reward.

d,e) Changes in choice bias (d, logistic shift) and perceptual sensitivity (e, logistic slope) induced by electrical microstimulation (abscissa and top histograms) or interactions between electrical microstimulation and reward condition (ordinate and right histograms). d, median values=0.79%, Wilcoxon signed rank test,  $p=0.015$  for the top histogram, 0.83% coherence,  $p=0.0035$  for the right histogram. e, -2.1,  $p=0.0012$  for the top histogram, -1.8,  $p=0.019$  for the right histogram. Colored circles with labels (a, b, c) correspond to the example sessions in a-c.

Fig. 3

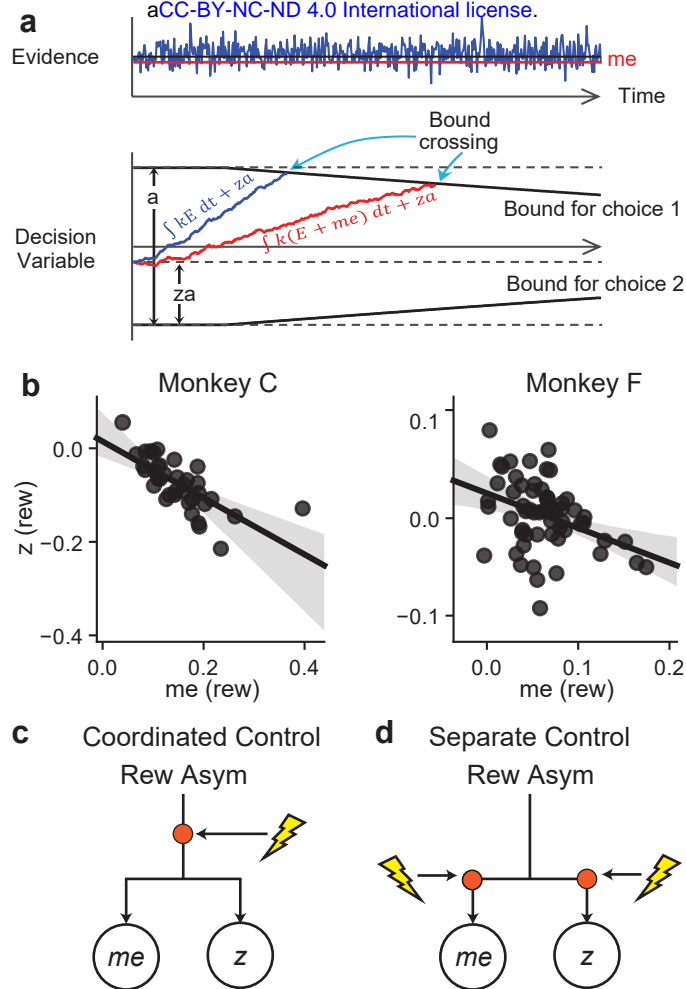

**Figure 3. Predicted microstimulation effects on reward asymmetry-induced coordinated adjustments of multiple computational components.**

a) Drift-diffusion model. Motion evidence ( $E$ ) is modeled as samples from a Gaussian distribution (mean =  $k \times \text{signed coh}$ , variance = 1). The decision variable is computed as the time integral of  $E$  and compared at each time point to two (possibly time-varying) decision bounds. Crossing of either bound results in the corresponding choice. RT is modeled as the sum of the time to bound-crossing and a non-decision time.

b) Both monkeys showed coupled adjustments in  $me$  and  $z$  parameters in the asymmetric reward contexts. Data were from a previous study without microstimulation<sup>17</sup>.

c,d) Alternative models of caudate's role in coordinated decision adjustments (e.g., changes in  $me$  and  $z$  from the DDM). In principle, caudate neurons (red circles) could provide joint (c) or independent (d) control of each computational variable.

Fig. 4

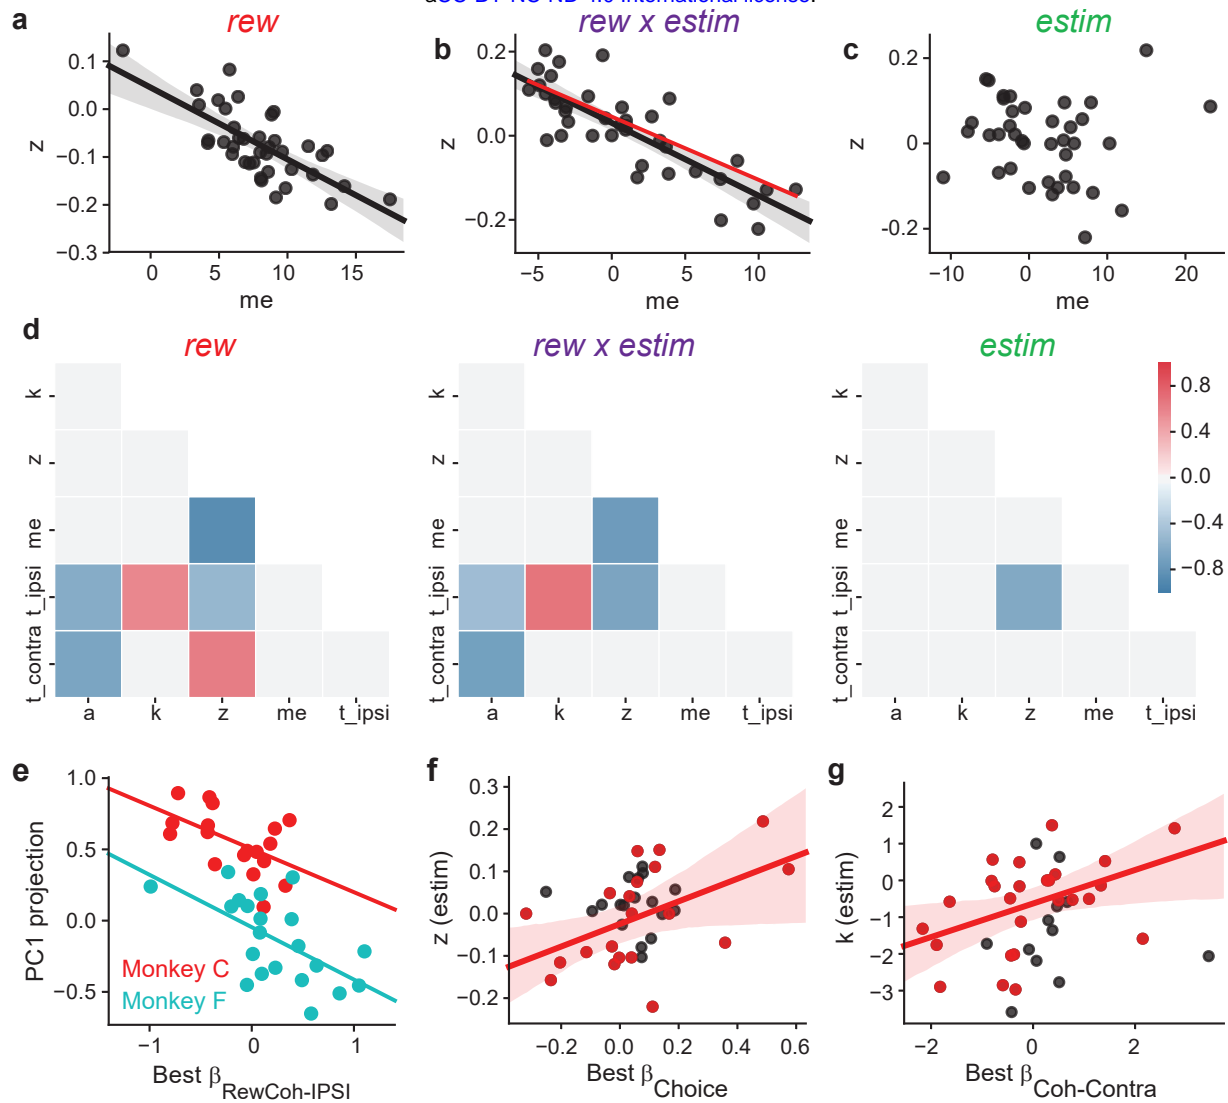

**Figure 4. Correlated microstimulation effects on DDM parameters reflected correlated reward asymmetry effects.**

a–c) Scatterplots of asymmetric adjustments in momentary evidence (me) and the bound height asymmetry (z) from fits of the DDM (Fig. 3a) to behavior for the reward asymmetry-induced adjustments in non-microstimulation trials (a), reward context-dependent microstimulation effects (b), and reward context-independent microstimulation effects (c). Solid lines indicate linear regression results with significant, non-zero slope values (two-sided t-test,  $p < 0.05$ ). Shaded areas indicate 95% confidence intervals. The line in (a) was replotted in (b) in red for comparison.

d) Pair-wise correlations between pairs of DDM parameters for the reward asymmetry-induced adjustments in non-microstimulation trials (“rew”), reward context-dependent microstimulation effects (“rew x estim”), and reward context-independent microstimulation effects (“estim”). Each color-coded box represents the average Pearson correlation coefficients of the two monkeys for changes in a pair of DDM parameters across sessions (see color bar). Pairs with non-significant correlation ( $p > 0.05$ , not corrected for multiple comparison) for either monkey or significant correlations but of opposite signs are shown in gray.

e) Scatterplot of the regression coefficient for neural encoding of the reward size-coherence interaction for trials with ipsilateral choices and the projections of reward context-dependent microstimulation effects from the DDM fits along PC1 (see text). Red data points/line: monkey C,  $p = 0.02$ ; Green data points/line: monkey F,  $p = 0.004$ .

f) Scatterplot of the regression coefficient value for neural encoding of “choice” and the reward context-independent microstimulation effect on the best-fitting value of the asymmetry bound height parameter (z). Red circles and line: sites in which the choice and reward context preferences were congruent; linear regression,  $p = 0.026$ . Black circles: sites with incongruent preferences;  $p = 0.72$ .

g) Scatterplot of the regression coefficient value for neural encoding of coherence for contralateral-choice trials and the reward context-independent microstimulation effect on the best-fitting value of the scalar for evidence (k). Red circles and line: sites in which the two coefficients for Coh-Contra and Coh-Ipsi had the same signs; linear regression t-test,  $p = 0.023$  and  $0.009$  for contralateral and ipsilateral choices (not shown), respectively. Black circles: sites with opposite signs;  $p > 0.4$  for both choices.

Sup. Fig. 1

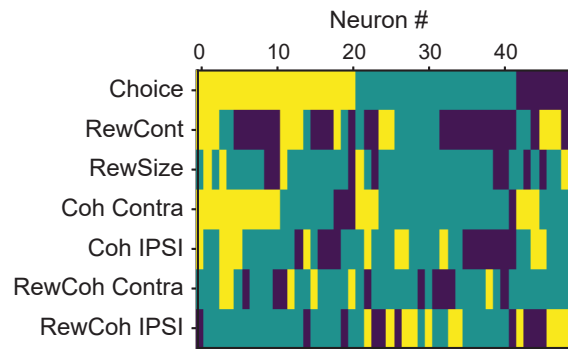

**Extended Data Figure 1. Modulation patterns of “combination neurons” during motion viewing.**

Color map showing the presence of significant non-zero regression coefficients for each combination neuron (in rows) during the epoch from 100 ms after motion onset until 100 ms before saccade onset. Yellow: positive; dark blue: negative; green: not significant; criterion:  $p = 0.05$ . Neurons were sorted by the signs of the coefficients.



Sup. Fig. 2

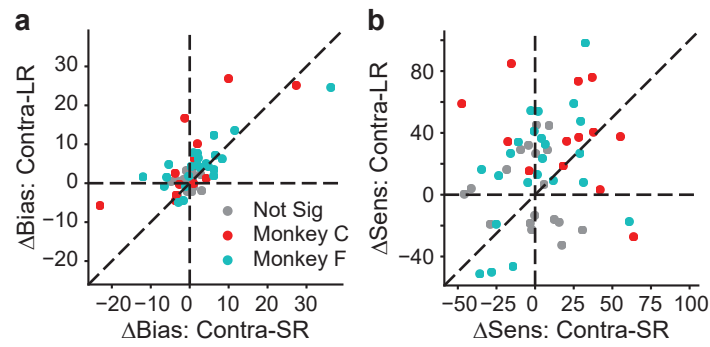

**Extended Data Figure 2.**

Scatterplots of effects of microstimulation on choice bias (a) and perceptual sensitivity (b) for the two reward contexts (contralateral-small-reward blocks on the abscissa, contralateral-large-reward blocks on the ordinate), measured from logistic fits to choice data. Gray data points represent sessions without a significant effect for either reward context (logistic regression,  $p>0.05$ ).

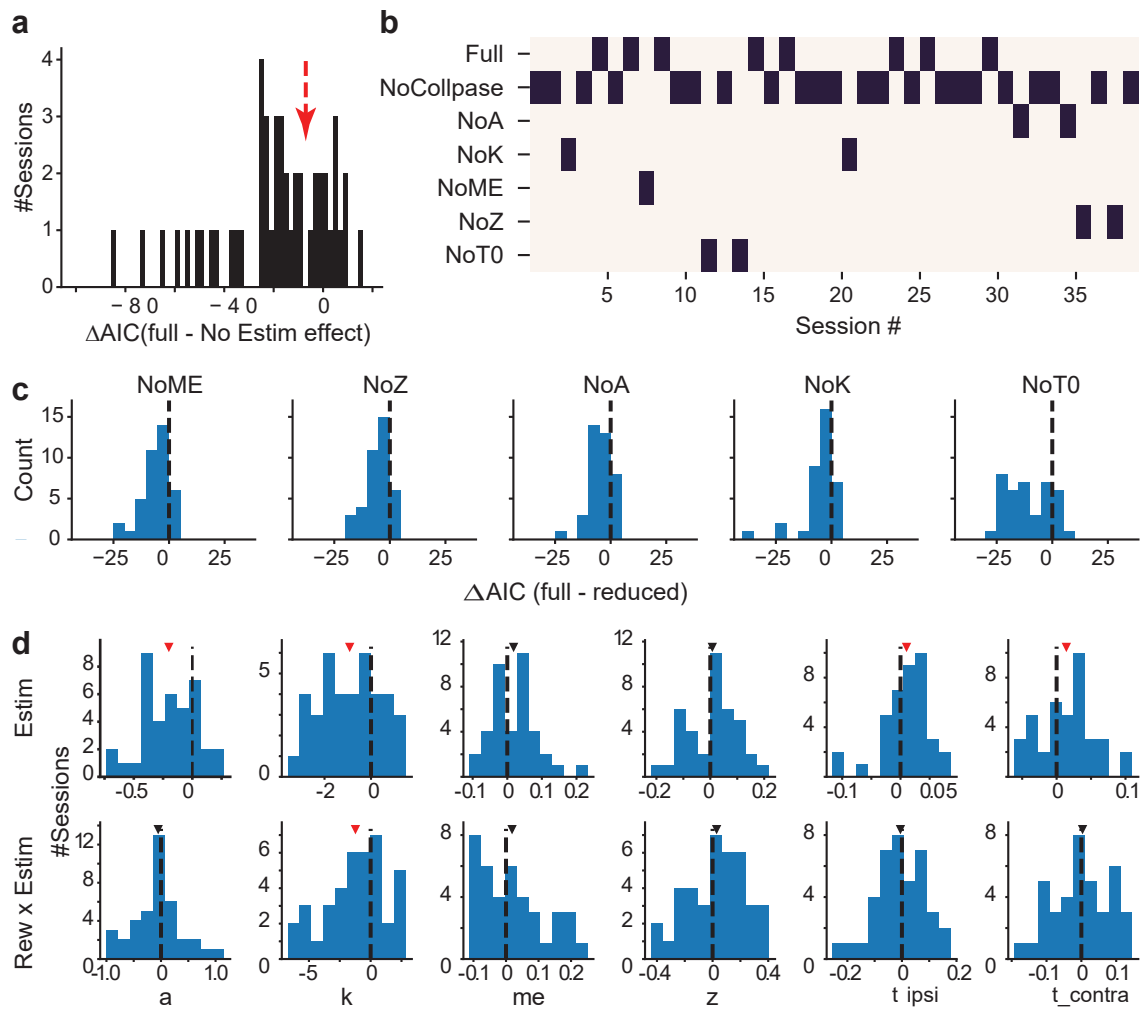

### Extended Data Figure 3. DDM fitting results.

a) Histogram of the difference in AIC between the full model, in which all DDM parameters were allowed to vary by reward context and microstimulation status, and a reduced model, in which all DDM parameters were allowed to vary by reward context but not microstimulation status. Negative AIC implies that the full model is better. The red arrow indicates the criterion we used and corresponds to the gap in the histogram.

b) Map showing the best DDM variant (lowest AIC, black bar) for sessions that showed an effect of microstimulation, which was defined as having a smaller AIC with the full model than a reduced model without microstimulation-induced changes (39 sessions to the left of the red arrow in a). See Methods for model variant definitions.

c) Histograms of differences in AIC between the full model and reduced models. Mean  $\Delta AIC$  values were negative for all reduced models ( $t$ -test,  $p < 0.001$  for all).

d) Histograms of best-fitting DDM parameters from the best model for each session. The top row (“Estim”) shows reward context-independent microstimulation effects. The bottom row (“Rew x Estim”) shows reward context-dependent microstimulation effects. Triangles indicate median values; red triangles indicate non-zero median values (Wilcoxon signed-rank test,  $p < 0.05$ , not corrected for multiple comparisons).

Sup. Fig. 4

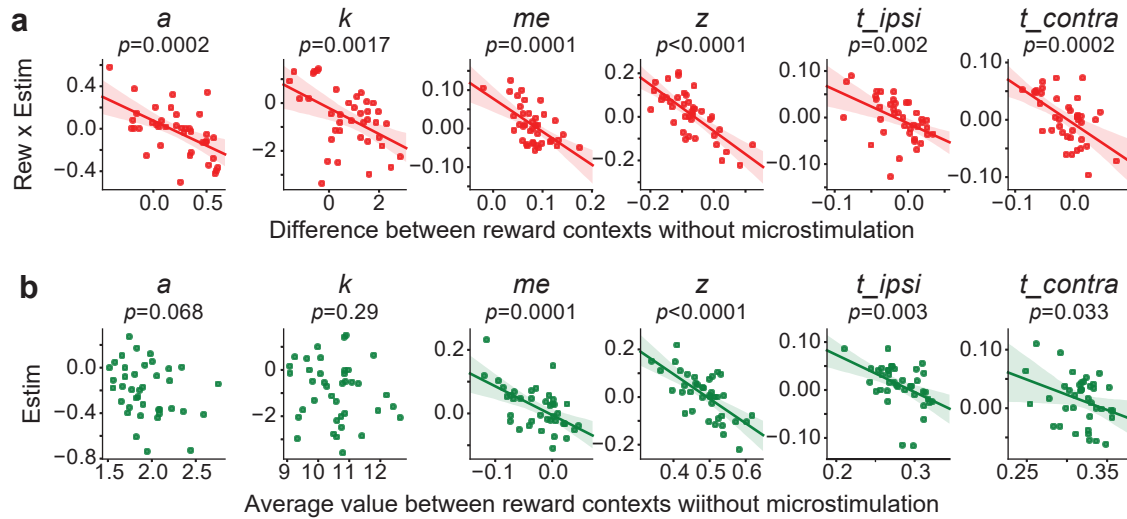

**Extended Data Figure 4. Relationships between microstimulation effects and monkeys' voluntary adjustments.**

a) Scatterplots of the effects of microstimulation that depended on reward context (ordinate) and reward asymmetry-induced adjustments without microstimulation (abscissa). Lines: linear regressions. P values were from *t*-test.

b) Scatterplots of the average effects of microstimulation between reward contexts (ordinate) and average adjustments between reward contexts without microstimulation (abscissa). Lines: linear regressions. P values were from *t*-test.

## Sup Fig. 5

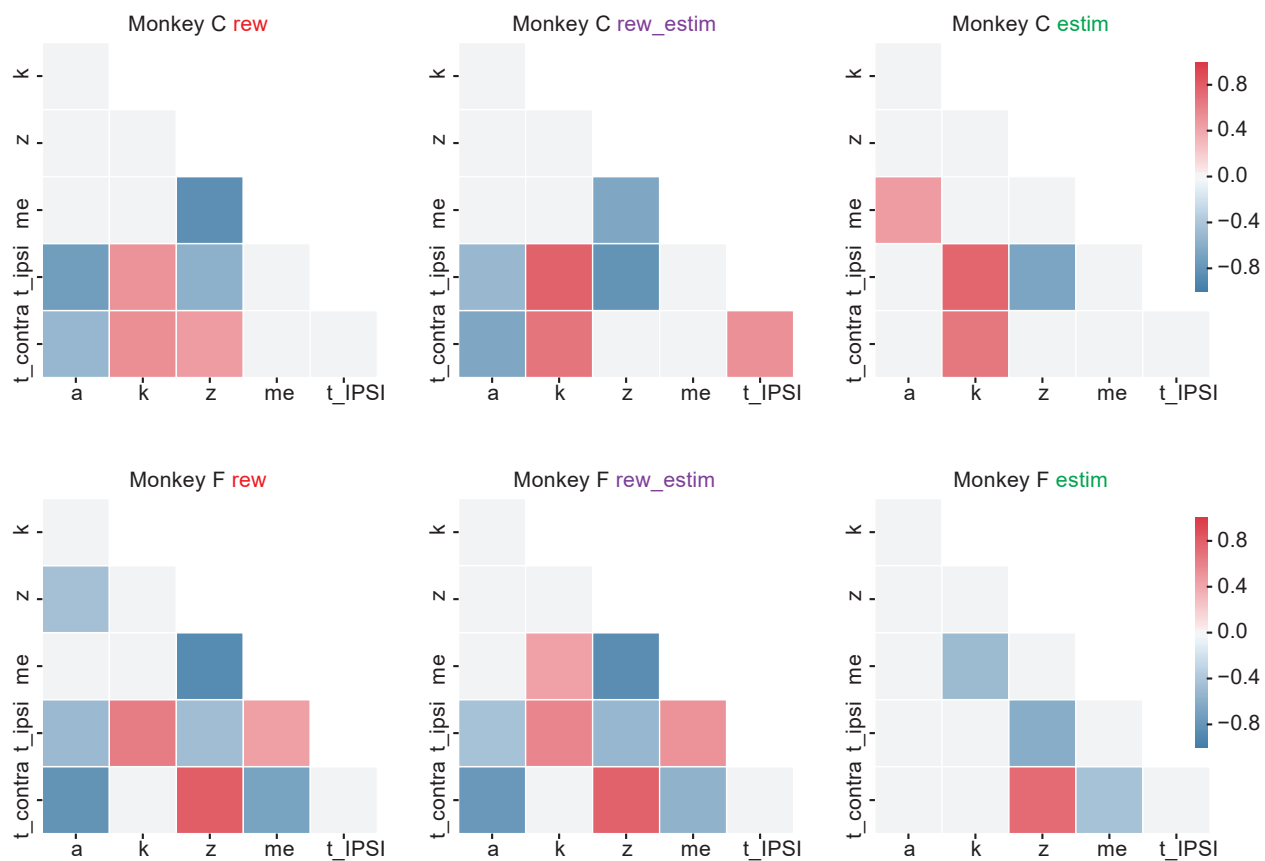

**Extended Data Figure 5. Pairwise correlation for the two monkeys.** Same format as Fig. 4d, but showing data from the two monkeys separately (rows).

Sup Fig. 6

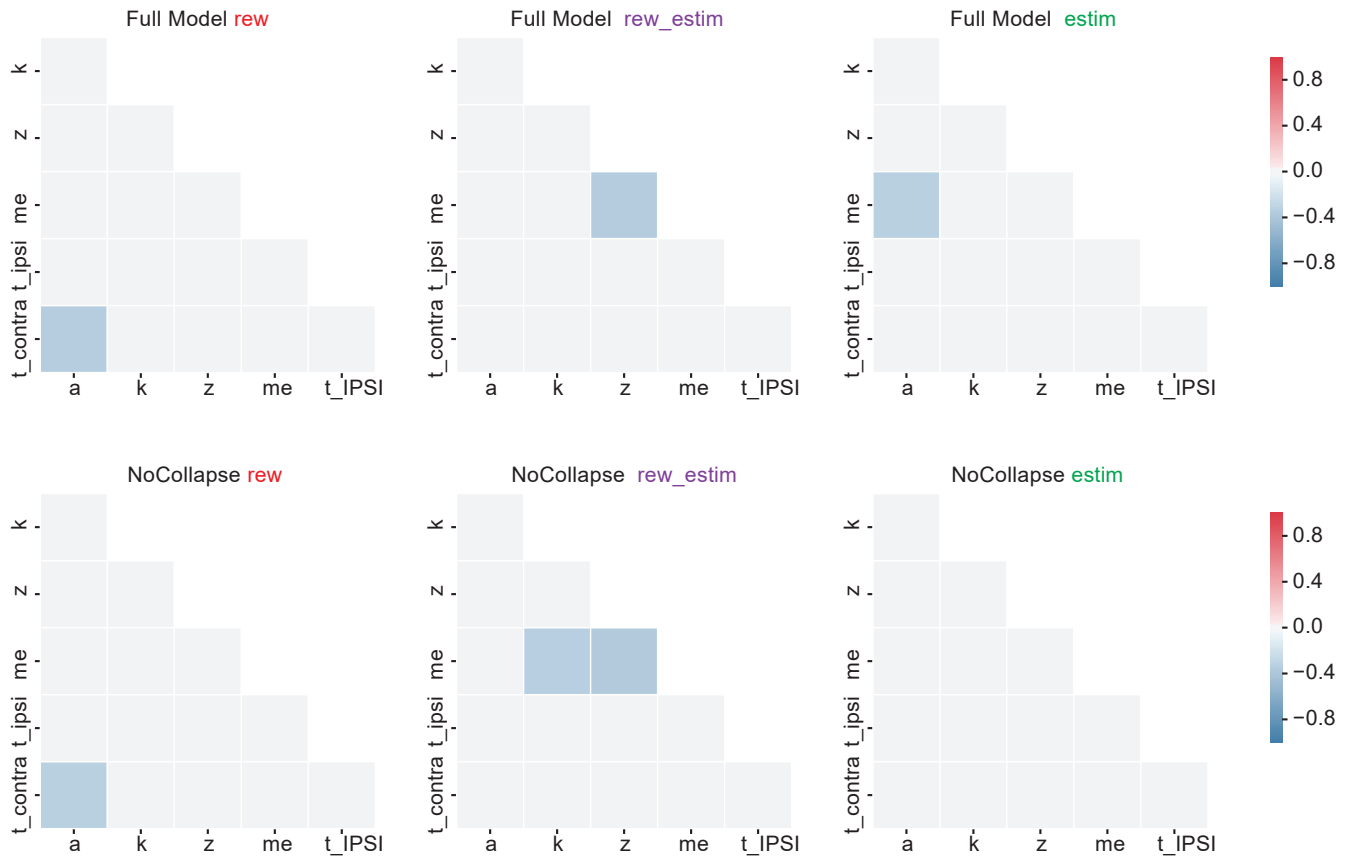

**Extended Data Figure 6. Pairwise correlation for simulated data fitted by the “Full” (top row) and “NoCollapse” (bottom row) models.** Choice and RT data were simulated using the DDM with random combinations of parameter values resampled from model fits from all individual sessions. Same format as Fig. 4d. Note the overall absence of consistent relationships between pairs of best-fitting parameter values.

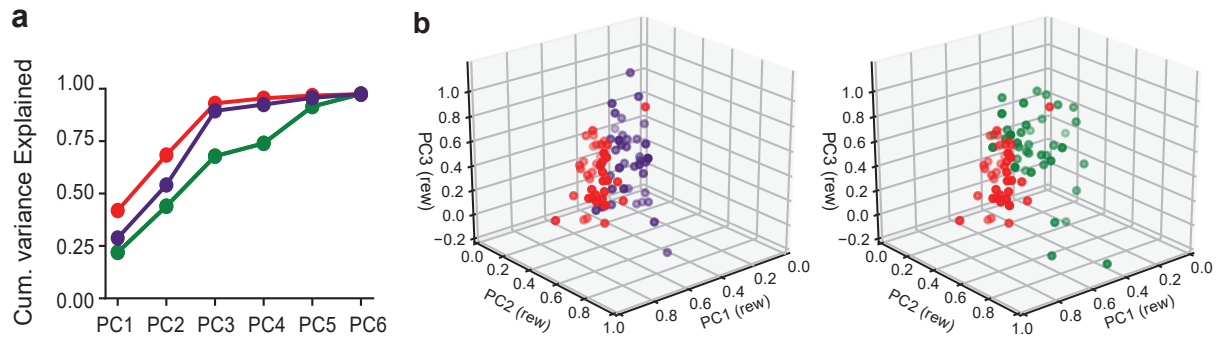

### Extended Data Figure 7. Principal component analysis.

a) Cumulative fractions of variance of the session-specific values of best-fitting DDM parameters explained by principal components (PCs) of those parameters computed using best-fitting values of reward asymmetry-induced adjustments from non-microstimulation trials. Red: reward asymmetry-induced adjustments from non-microstimulation trials (“rew”), from which the PCs were extracted. Purple: reward context-dependent microstimulation effects (“rew-estim”). Green: reward context-independent microstimulation effects (“estim”).

b) Projections of “rew” (red), “rew-estim” (purple) and “estim” (green) effects on DDM parameters in a 3D space defined by the first three principal components derived from the “rew” effects. The same “rew” data are plotted in both panels.
